# Supplementary material for: Receptor utilization of angiotensin converting enzyme 2 (ACE2) indicates a narrower host range of SARS-CoV-2 than that of SARS-CoV
Source: bioRxiv or medRxiv preprint supplement (doi:10.1101/2020.06.13.149930), 2020-06-13
Supplement: Supplementary file [file media-1.pdf]

**Table S1. Information about the ACE2 orthologs used in this study**

| <b>Species</b>                      | <b>Common Name</b> | <b>NCBI Accession</b> |
|-------------------------------------|--------------------|-----------------------|
| <i>Bos Taurus</i>                   | Cattle             | NC_037357.1           |
| <i>Canis lupus dingo</i>            | Dog                | NW_020267596.1        |
| <i>Capra hircus</i>                 | Goat               | NW_017189516.1        |
| <i>Carassius auratus</i>            | Crucian            | NC_039253.1           |
| <i>Crocodylus porosus</i>           | Crocodile          | NW_017728906.1        |
| <i>Equus caballus</i>               | Horse              | NC_009175.3           |
| <i>Felis catus</i>                  | Cat                | NC_018741.3           |
| <i>Gallus gallus</i>                | Chicken            | NC_006088.5           |
| <i>Lynx canadensis</i>              | Lynx               | NC_044321.1           |
| <i>Macaca nemestrina</i>            | Monkey             | NW_012017243.1        |
| <i>Manis javanica</i>               | Pangolin           | NW_016527422.1        |
| <i>Mustela erminea</i>              | Mustela            | NC_045635.1           |
| <i>Oryctolagus cuniculus</i>        | Rabbit             | NC_013690.1           |
| <i>Protobothrops mucrosquamatus</i> | Viper snake        | NW_015387079.1        |
| <i>Pteropus alecto</i>              | Black flying fox   | NW_006435837.1        |
| <i>Sus scrofa</i>                   | Swine              | NC_010461.5           |
| <i>Homo sapiens</i>                 | Human              | NM_021804.2           |
| <i>Mus musculus</i>                 | Mmouse             | NM_001130513.1        |
| <i>Rhinolophus sinicus</i>          | bat                | KC881004.1            |
| <i>Paguma larvata</i>               | civet              | AY881174.1            |
